# Supplementary material for: Cu–Fe bimetallic MOF enhances the selectivity of photocatalytic CO2 reduction toward CO production
Source: Royal Society of Chemistry journal article supplement (doi:10.1039/d3cy00842h), 2023-01-01
Supplement: d3cy00842h1.pdf [file d3cy00842h1.pdf]

## Cu-Fe bimetallic MOF enhanced selectivity of photocatalytic CO<sub>2</sub> reduction for product CO

Huayong Yang, Min Zhang, Zhongjie Guan, Jianjun Yang\*

National & Local Joint Engineering Research Center for Applied Technology of Hybrid  
Nanomaterials, Henan University, Kaifeng 475004, Henan, China

\*Corresponding author E-mails: [yangjianjun@henu.edu.cn](mailto:yangjianjun@henu.edu.cn)

### Supplementary Figures

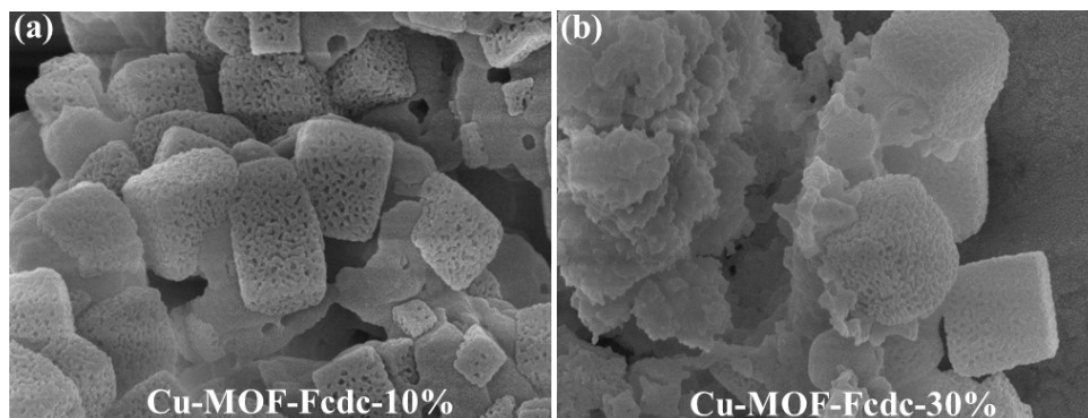

Fig. S1 SEM images of Cu-MOF-10% (a) and Cu-MOF-Fcdc-30% (b).

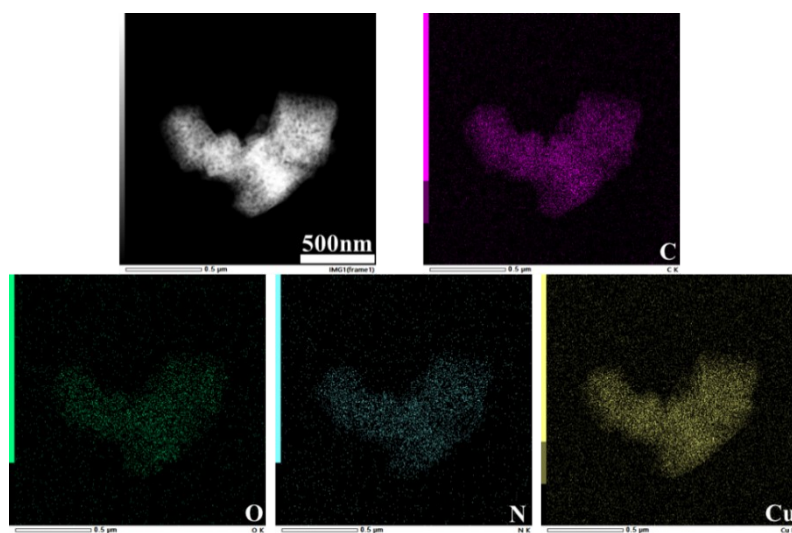

Fig. S2 TEM elemental mappings of Cu-MOF.

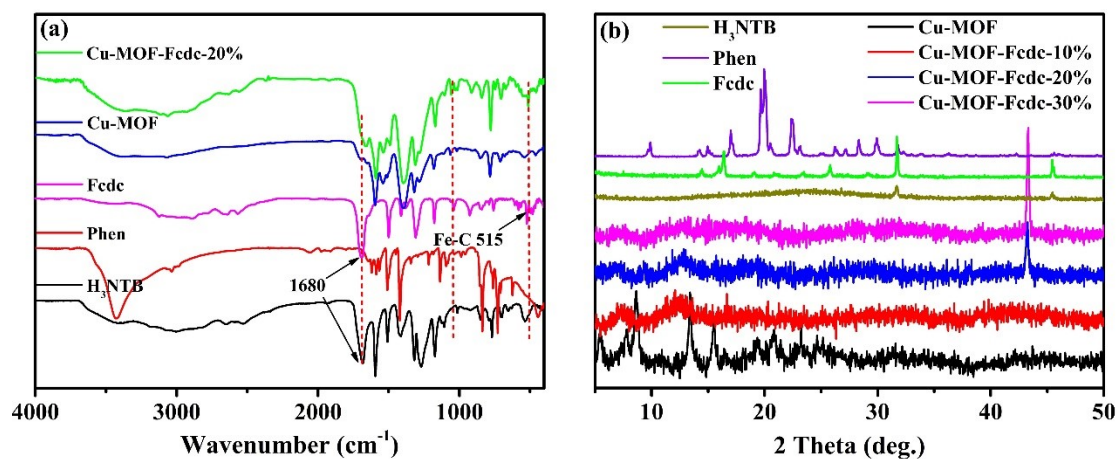

Fig. S3 The IR spectra (a) and XRD curves (b) of the series samples.

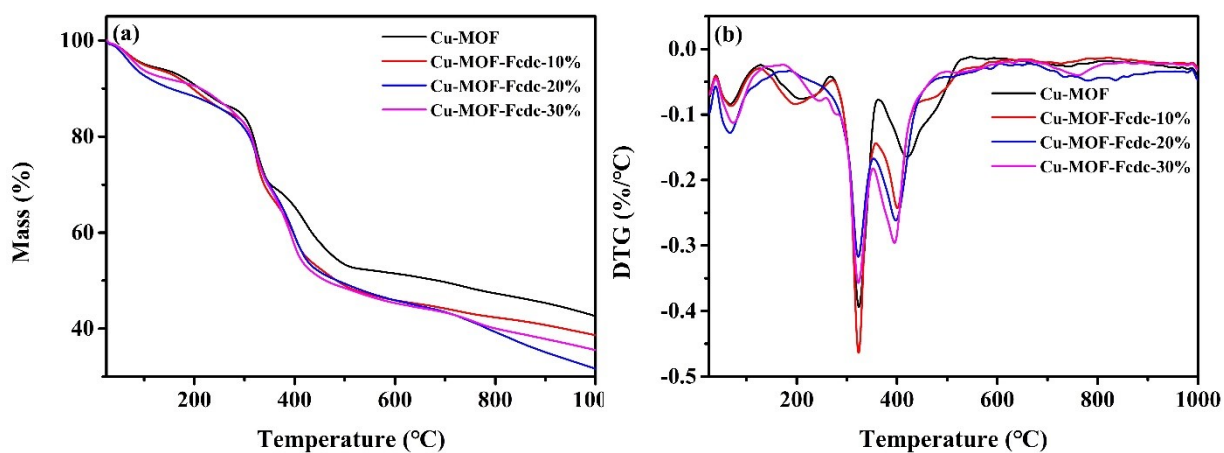

Fig. S4 The TG (a) and DTG (b) curves of Cu-MOF and Cu-MOF-Fcdc (-10%, 20%, and 30%).

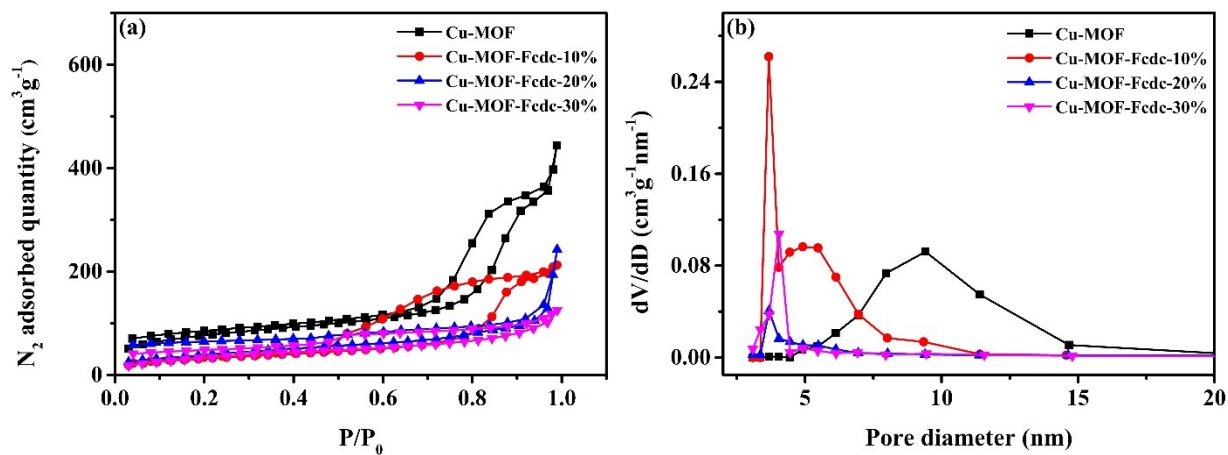

Fig. S5 The N<sub>2</sub> adsorption/desorption isotherms of Cu-MOF and Cu-MOF-Fcdc (-10%, 20%, and 30%) (a), and the corresponding pore size distribution curves (b).

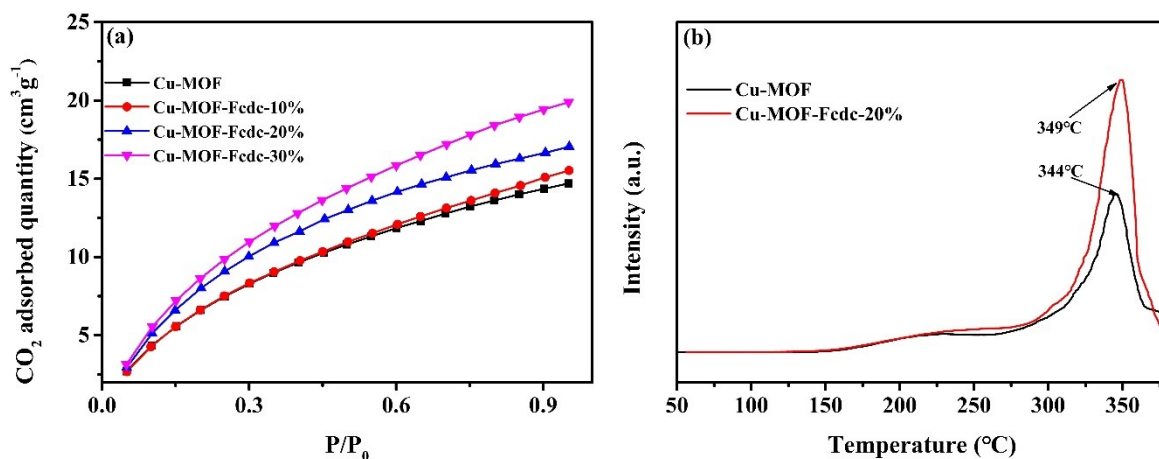

**Fig. S6** The CO<sub>2</sub> adsorption isotherms of Cu-MOF and Cu-MOF-Fcdc (-10%, 20%, and 30%) (a), and CO<sub>2</sub>-TPD curves (b).

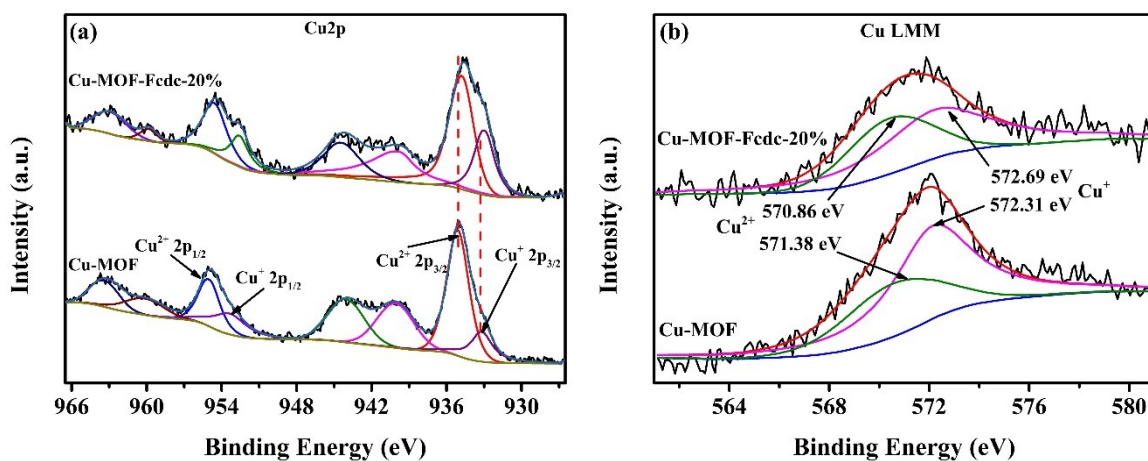

**Fig. S7** (a) The Cu 2p XPS spectra of Cu-MOF and Cu-MOF-Fcdc-20%; (b) The Cu LMM Auger spectra.

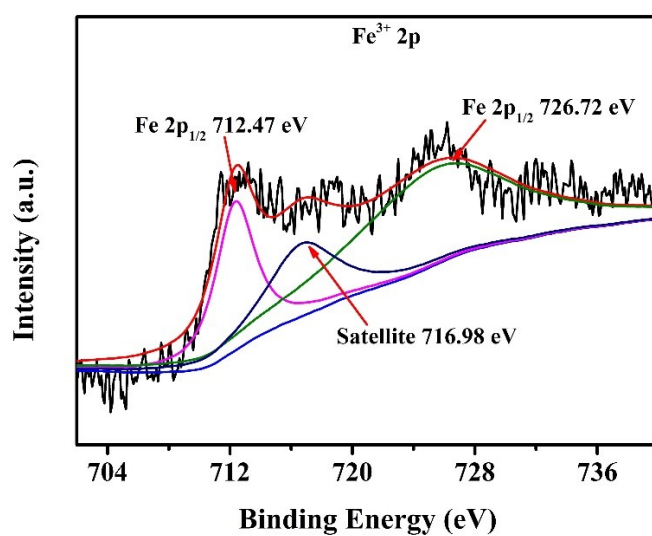

**Fig. S8** The Fe 2p (Fe<sup>3+</sup>) XPS spectra of Cu-MOF-Fcdc-20%.

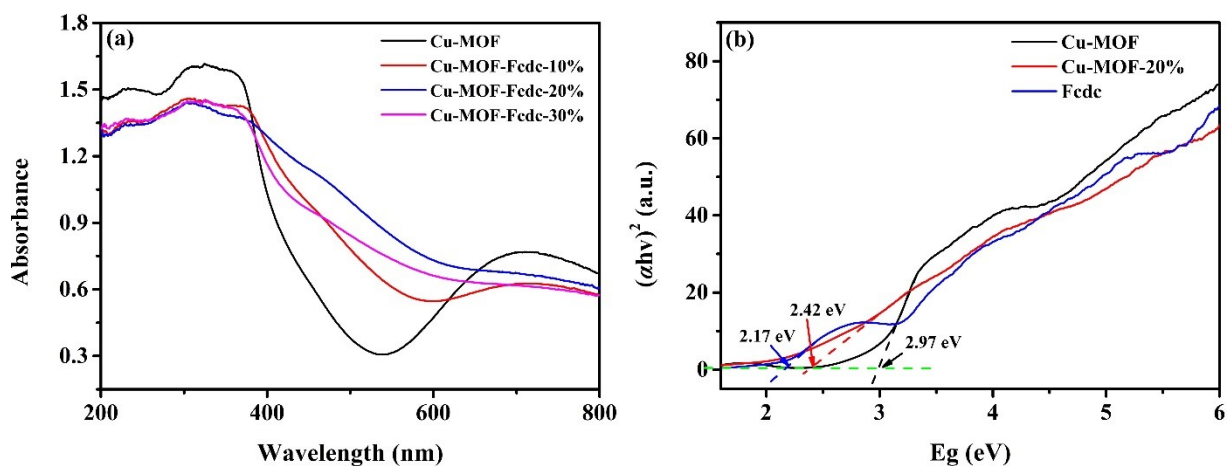

**Fig. S9** (a) The UV-vis DRS spectra of Cu-MOF and Cu-MOF-Fcdc (-10%, 20%, and 30%), and (b) The Tauc curves of Cu-MOF, Cu-MOF-Fcdc-20% and Fcdc ligand.

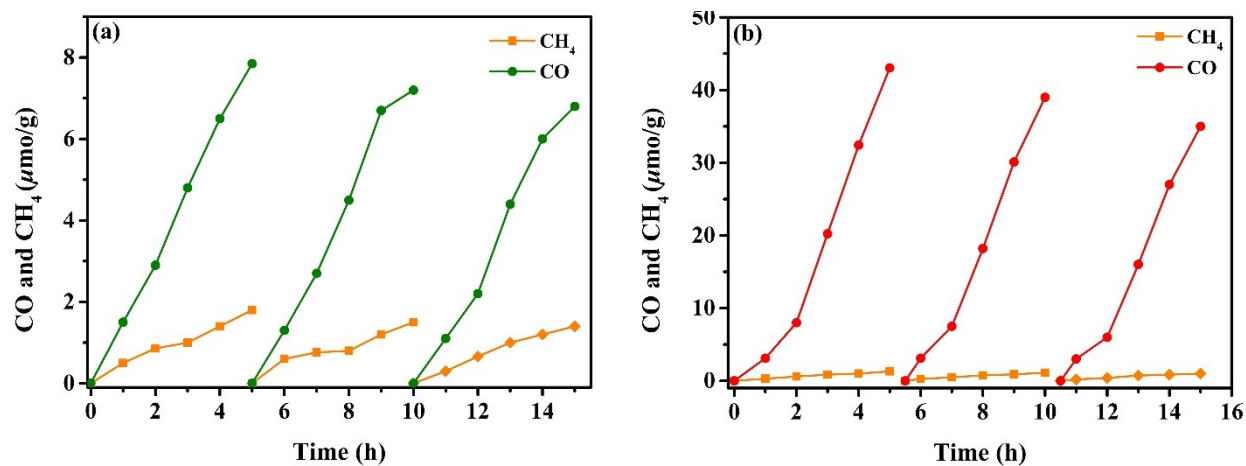

**Fig. S10** The yields of CH<sub>4</sub> and CO for Cu-MOF (a) and Cu-MOF-Fcdc-20% (b) as composite photocatalysts in the CO<sub>2</sub> reduction process.

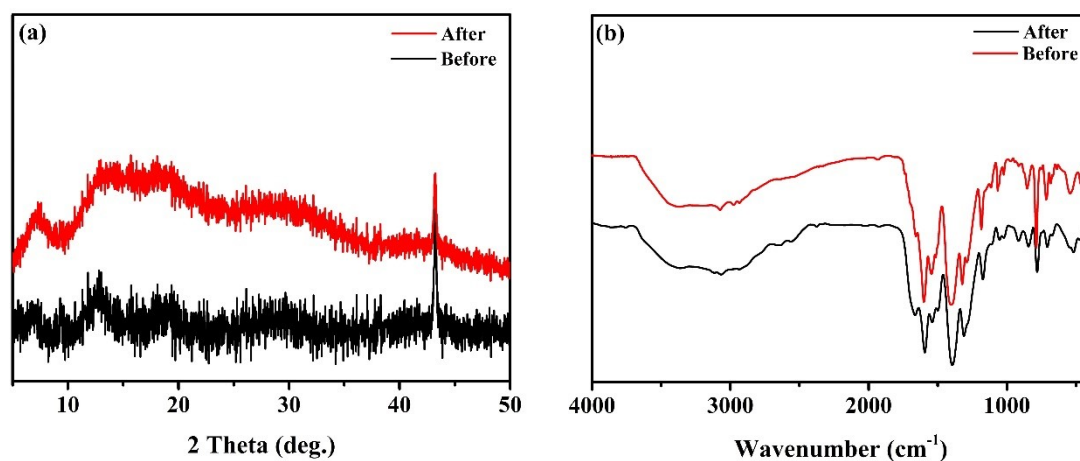

**Fig. S11** XRD curves (a) and FTIR spectra (b) of Cu-MOF-Fcdc-20% before and after photocatalytic CO<sub>2</sub> reduction.

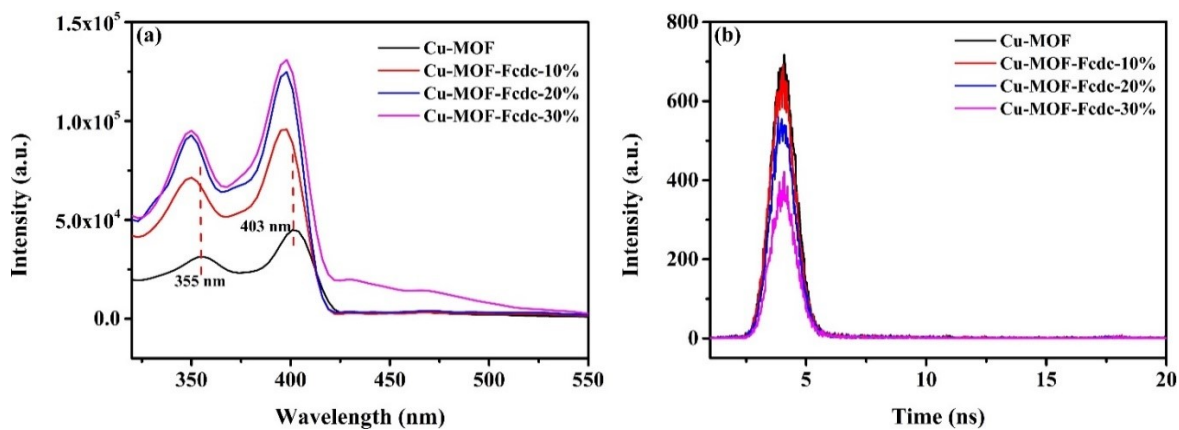

**Fig. S12** PL emission spectra (a) and lifetime decay curves (b) for Cu-MOF and Cu-MOF-Fcdc (-10%, 20%, and 30%).

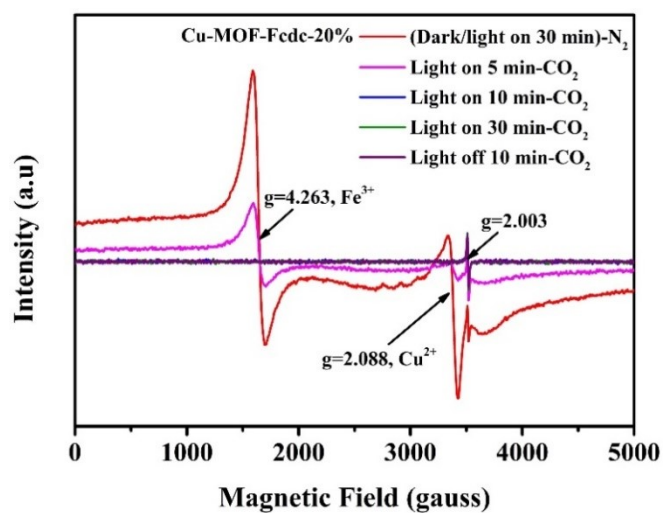

**Fig. S13** The EPR spectra of Cu-MOF-Fcdc-20% illuminated in CO<sub>2</sub> atmosphere.

## Tables

**Table S1.** The contents of Cu and Fe elements in different Cu-MOF-Fcdc(10%, 20%, and 30%) by SEM.

| Samples              | Cu、 Fe (mmol) | Wt%   | At%  |
|----------------------|---------------|-------|------|
| Cu-MOF-Fcdc-10%/SEM  |               |       |      |
| Cu                   | 0.1           | 9.59  | 2.22 |
| Fe                   | 0.01          | 0.99  | 0.26 |
| Cu-MOF-Fcdc-20% /SEM |               |       |      |
| Cu                   | 0.1           | 15.45 | 3.75 |
| Fe                   | 0.02          | 3.20  | 0.88 |
| Cu-MOF-Fcdc-30%/SEM  |               |       |      |
| Cu                   | 0.1           | 8.44  | 1.95 |
| Fe                   | 0.03          | 3.09  | 0.81 |

**Table S2.** The Cu and Fe element contents of Cu-MOF and Cu-MOF-Fcdc (-10%, 20%, and 30%) by ICP-OES.

| Samples         | Cu content (mg/L) | Fe content (mg/L) | wt% (Fe) |
|-----------------|-------------------|-------------------|----------|
| Cu-MOF          | 85.00             | 0.00              | 0.00     |
| Cu-MOF-Fcdc-10% | 83.10             | 2.80              | 2.80%    |
| Cu-MOF-Fcdc-20% | 78.60             | 3.70              | 3.70%    |
| Cu-MOF-Fcdc-30% | 66.40             | 4.90              | 4.90%    |

1.00 mg Cu-MOF sample was dissolved in 500.00  $\mu\text{L}$   $\text{HNO}_3$  and filled with water to 10.00 mL. Then, take 1.00 mL clear liquid and dilute it again to 10.00 mL for ICP-OES test. Perform the same operation as above for other samples.

**Table S3.** Summary of specific surface area, pore size and pore volume data of each sample

| Samples         | Surface Area m <sup>2</sup> /g | Pore Diameter/nm | Total pore volume cc/g |
|-----------------|--------------------------------|------------------|------------------------|
| Cu-MOF          | 267.997                        | 9.411            | 0.6866                 |
| Cu-MOF-Fcdc-10% | 215.606                        | 3.671            | 0.5616                 |
| Cu-MOF-Fcdc-20% | 144.557                        | 3.677            | 0.375                  |
| Cu-MOF-Fcdc-30% | 131.249                        | 4.046            | 0.1936                 |

**Table S4.** Activity data of photocatalytic CO<sub>2</sub>RR in controlled experiments

| Samples                                       | CH <sub>4</sub> (μmol/g/h) | CO (μmol/g/h) | Selectivity |
|-----------------------------------------------|----------------------------|---------------|-------------|
| Cu-MOF                                        | 0.36                       | 1.57          | 81.35%      |
| Cu-MOF-Fcdc-10%                               | 0.14                       | 2.04          | 93.58%      |
| Cu-MOF-Fcdc-20%                               | 0.26                       | 8.61          | 97.07%      |
| Cu-MOF-Fcdc-30%                               | 0.31                       | 6.42          | 95.39%      |
| Cu-Fcdc                                       | 0.17                       | 5.81          | 98.81%      |
| Mixed Cu-MOF and Cu-Fcdc (m, 4:1=<br>Cu:Fcdc) | 1.26                       | 0.76          | 37.62%      |
| Cu-NTB-Fcdc-20%                               | 0.75                       | 2.79          | 78.81%      |
| Cu-phen-Fcdc-20%                              | 0.52                       | 2.12          | 80.30%      |
| Cu-MOF-Fca-20%                                | 0.96                       | 4.21          | 81.43%      |
| Cu-MOF-Fc-20%                                 | 0.6                        | 2.22          | 78.72%      |
| Cu-MOF-Fcdc-20%-N <sub>2</sub>                | 0                          | 0             |             |

**Table S5.** Performance comparison of recently reported MOF- based photocatalysts applied in the literature for CO<sub>2</sub> reduction to CO

| Catalyst                 | Reaction medium             | Light range                        | Products              | Yield (μmol/g/h),<br>Selectivity | Reference |
|--------------------------|-----------------------------|------------------------------------|-----------------------|----------------------------------|-----------|
| Cu-MOF-Fcdc-<br>20%      | Gas-Solid, H <sub>2</sub> O | > 360 nm,<br>210mW/cm <sup>2</sup> | CO<br>CH <sub>4</sub> | 8.61, 97.07%<br>0.26             | This work |
| Co-MOF/Cu <sub>2</sub> O | Gas-Solid, H <sub>2</sub> O | > 420 nm,                          | CO                    | 3.83, 100%                       | 1         |



|                                          |                             |                                    |                       |                       |   |
|------------------------------------------|-----------------------------|------------------------------------|-----------------------|-----------------------|---|
|                                          |                             | 480mW/cm <sup>2</sup>              |                       |                       |   |
| COF@Ti-MOF                               | Gas-Solid, H <sub>2</sub> O | > 360 nm,                          | CO<br>CH <sub>4</sub> | 78.7, 100%            | 2 |
| Mn-MOF                                   | Gas-Solid, H <sub>2</sub> O | > 360 nm,<br>100mW/cm <sup>2</sup> | CO<br>CH <sub>4</sub> | 50, 70.4%<br>21       | 3 |
| Co-MOF/GR                                | Gas-Solid, H <sub>2</sub> O | > 420 nm,<br>300mW/cm <sup>2</sup> | CO<br>CH <sub>4</sub> | 20.25, 92.63%<br>1.61 | 4 |
| CdS/Ni-MOF                               | Gas-Solid, H <sub>2</sub> O | > 360 nm,<br>300mW/cm <sup>2</sup> | CO<br>CH <sub>4</sub> | 1.75, 93.1%<br>0.13   | 5 |
| Co <sub>0.1</sub> Ni <sub>0.9</sub> -MOF | Gas-Solid, H <sub>2</sub> O | > 360 nm                           | CO                    | 38.74, 100%           | 6 |
| Zn-MOF/BiV <sub>4</sub>                  | Gas-Solid, H <sub>2</sub> O | > 420 nm                           | CO<br>CH <sub>4</sub> | 4.30, 87.40%<br>0.62  | 7 |
| PCN-250-Fe <sub>3</sub>                  | Gas-Solid, H <sub>2</sub> O | > 420 nm,<br>480mW/cm <sup>2</sup> | CO<br>CH <sub>4</sub> | 1.01, 19.84%<br>4.08  | 8 |

**Table S6.** PL lifetime of different samples

| Samples        | Cu-MOF | Cu-MOF-Fcdc-10% | Cu-MOF-Fcdc-20% | Cu-MOF-Fcdc-30% |
|----------------|--------|-----------------|-----------------|-----------------|
| A <sub>1</sub> | 761.54 | 713.54          | 436.84          | 594.95          |
| $\tau_1/ns$    | 0.57   | 0.61            | 0.74            | 0.60            |
| R <sup>2</sup> | 0.99   | 1.04            | 1.02            | 1.03            |

## References

- 1 W.-W. Dong, J. Jia, Y. Wang, J.-R. An, O.-Y. Yang, X.-J. Gao, Y.-L. Liu, J. Zhao and D.-S. Li, *Chem. Eng. J.*, 2022, **438**, 135622.
- 2 R.-G. Yang, Y.-M. Fu, X. Meng, L. Xue, Z. Zhou, Y.-O. He, J.-X. Qu, H.-N. Wang and Z.-M. Su, *Inorg. Chem. Front.*, 2023, **10**, 3699–3705.
- 3 J.-H. Qin, P. Xu, Y.-D. Huang, L.-Y. Xiao, W. Lu, X.-G. Yang, L.-F. Ma and S.-Q. Zang, *Chem. Commun.*, 2021, **57**, 8468–8471.
- 4 L. Cheng, C. Wu, H. Feng and H. Liu, *Catal. Sci. Technol.*, 2022, **12**, 7057–7064.
- 5 M. Xu, C. Sun, X. Zhao, H. Jiang, H. Wang and P. Huo, *Appl. Surf. Sci.*, 2022, **576**, 151792.
- 6 T. Wei, L. Wang, K. Mao, J. Chen, J. Dai, Z. Zhang, L. Liu and X. Wu, *J. Colloid Interface Sci.*, 2022, **622**, 402–409.
- 7 Z. Zhao, J. Bian, L. Zhao, H. Wu, S. Xu, L. Sun, Z. Li, Z. Zhang and L. Jing, *Chin. J. Catal.*, 2022, **43**, 1331–1340.
- 8 J.-R. An, Y. Wang, W.-W. Dong, X.-J. Gao, O.-Y. Yang, Y.-L. Liu, J. Zhao and D.-S. Li, *ACS Appl. Energy Mater.*, 2022, **5**, 2384–2390.
